# Supplementary material for: Synergistic dispersion and biodegradation of oil in seawater based on Janus nanosheets and oil-degrading bacteria
Source: Royal Society of Chemistry journal article supplement (doi:10.1039/d3en00580a), 2023-12-07
Supplement: d3en00580a1.pdf [file d3en00580a1.pdf]

**The synergistic dispersion and biodegradation for oil in seawater  
based on Janus nanosheets and oil-degrading bacteria**

Haosen Zhao <sup>a, b</sup>, Xin Hu <sup>a, b</sup>, Hu Kang <sup>a, b</sup>, Dongdong Yang <sup>a, b</sup>, Mutai Bao <sup>a, b</sup>, Yiming  
Li <sup>a, b</sup>\*

<sup>a</sup> Frontiers Science Center for Deep Ocean Multispheres and Earth System/Key  
Laboratory of Marine Chemistry Theory and Technology, Ministry of Education,  
Ocean University of China, 266100, Qingdao, P.R. China

<sup>b</sup> College of Chemistry and Chemical Engineering, Ocean University of China, 266100,  
Qingdao, P.R. China

---

\* Corresponding authors.  
E-mail address: liym@ouc.edu.cn (Y. M. Li).

### **Text 1. The preparation of HSMA**

150 mL toluene, 5.9220 mL styrene, 5.0516 g maleic anhydride, 0.1042 g 2, 2-Azobis(2-methylpropionitrile) were added in 250 mL three-mouth flask with stirring. After purging with nitrogen for 30 min, the mixture was heated to 85°C and then refluxed for 3 h to obtain a white emulsion. A certain amount of toluene was added to wash the white product and dried in a vacuum oven at 60°C.

5.0 g of the above products were dissolved in 45 g of 3 wt% sodium hydroxide solution and stirred at 80°C for 3 hours to get 10 wt% hydrolyzed styrene-maleic anhydride (10 wt% HSMA).

### **Text 2. Silica particles as markers to load on the JNs**

2.0 g of JNs, 1 ml of TEOS and 10ml of water were added to a beaker and stirred at 70°C for 12 hours, then washed with water and dried in a vacuum oven at 60 °C.

### **Text 3. Immobilization of bacteria**

2ml of bacterial suspension was absorbed and centrifuged at 1000 r·min<sup>-1</sup> for 2min, and washed three times with sterile water. 2.5% glutaraldehyde was added to the bacterial seed solution and then stood for 30min.

Gradient dehydration method was performed by ethanol: 75%, 90% and absolute ethanol were successively allowed to stand for 15min, and then centrifuged. Finally, the immobilized bacteria are dried for 3 hours at 85 ° C.

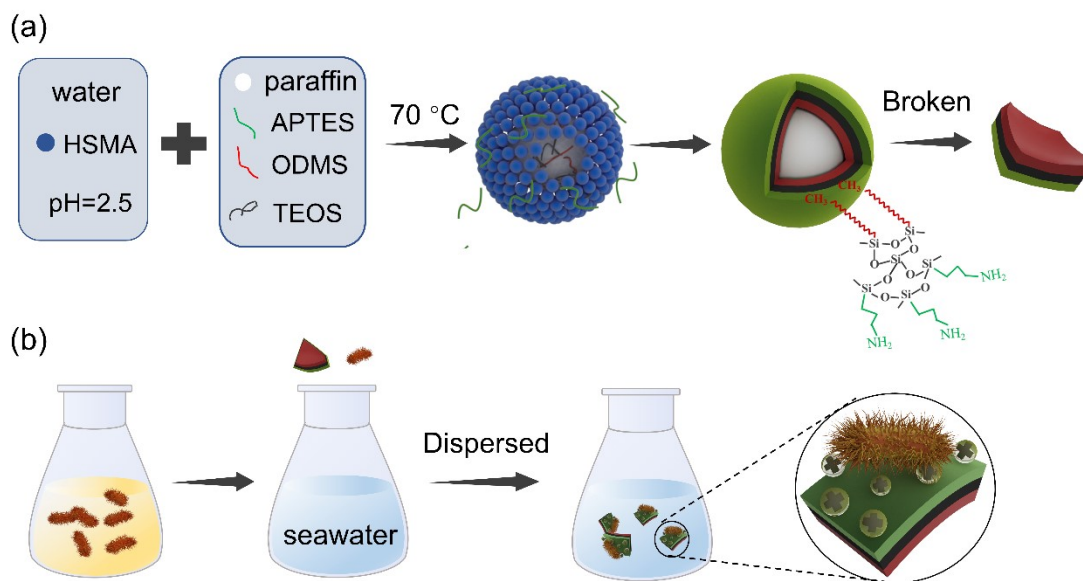

**Fig. S1** Schematic illustration of (a) JNs preparation and (b) the process of JNs combining with AP-1 bacteria.

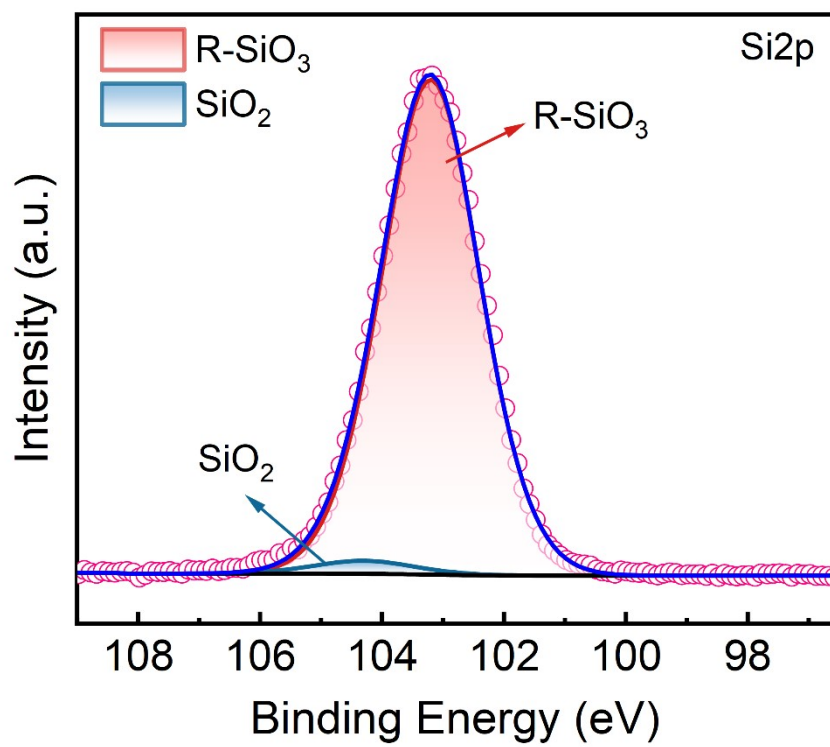

Fig. S2 XPS spectrum of Si2p.

Table S1. Comparison of dispersion effect of partial solid particles

| Name                                       | Materials    | Oil phase           | Material concentration | Oil-water volume ratio | Oil droplet size    | References |
|--------------------------------------------|--------------|---------------------|------------------------|------------------------|---------------------|------------|
| Carboxyl-terminated carbon black           | carbon black | BP-MC 252 crude oil | 0.015 wt %             | 1:9                    | ~150 $\mu\text{m}$  | 6          |
| Kaolinite                                  | natural clay | Anadarko crude oil  | 25 g/L                 | 1:30                   | ~150 $\mu\text{m}$  | 9          |
| Janus silica particles (JSPs)              | silica       | n-tetradecane       | 12 g/L                 | 1:4                    | ~ 50 $\mu\text{m}$  | 14         |
| Polymer-inorganic Janus nanosheets         | silica       | toluene             | 1.0 wt%                | 1:2                    | ~ 100 $\mu\text{m}$ | 18         |
| Poly (allylamine hydrochloride)-attapulgit | attapulgit   | n-tetradecane       | 20 g/L                 | 1:4                    | ~33 $\mu\text{m}$   | 31         |
| Janus nanosheets                           | silica       | diesel oil          | 8 g/L                  | 1:4                    | ~ 50 $\mu\text{m}$  | This work  |

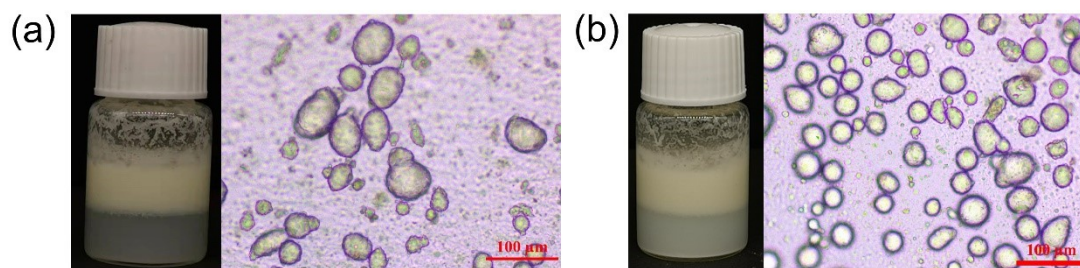

**Fig. S3** (a) Emulsification of JNs, (b) Synergistic emulsification of JNs and bacteria ( $OD_{600}=1.72$ ). Both groups were emulsified under the following conditions: concentration of JNs is 0.08 g/L, the volume ratios of diesel-seawater is 1:4, stabilization time is 24 h.

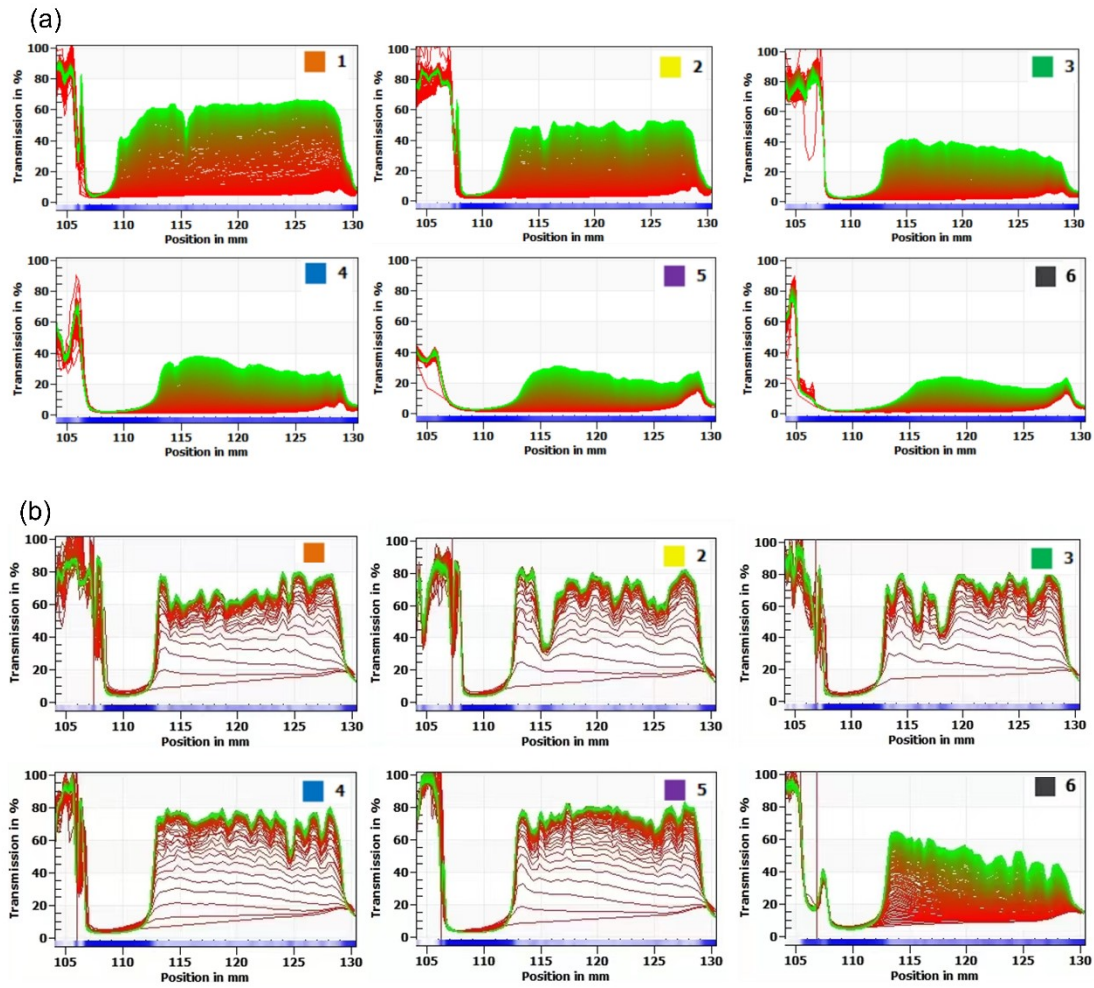

**Fig. S4** The transmission profiles of (a) different concentrations of JNs, (b) different concentrations of AP-1. Both groups were stable under the following conditions: the number of spectral lines is 300, the time interval is 1 s, the speed is 1500 rpm, the light intensity is 1, and the light source is 870 nm.

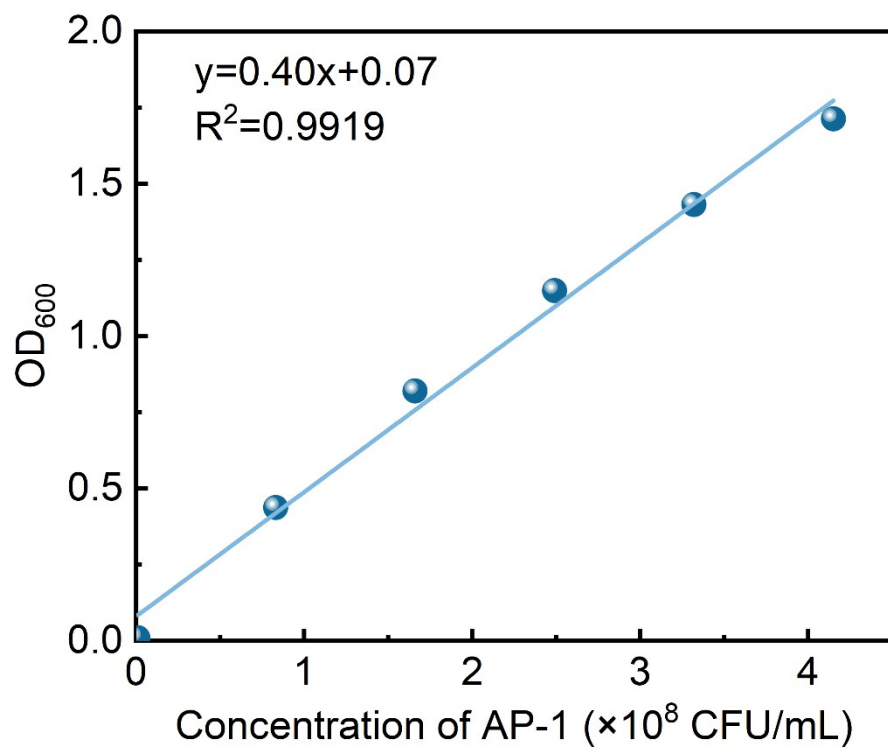

**Fig. S5** The curve of OD value and bacterial concentration.



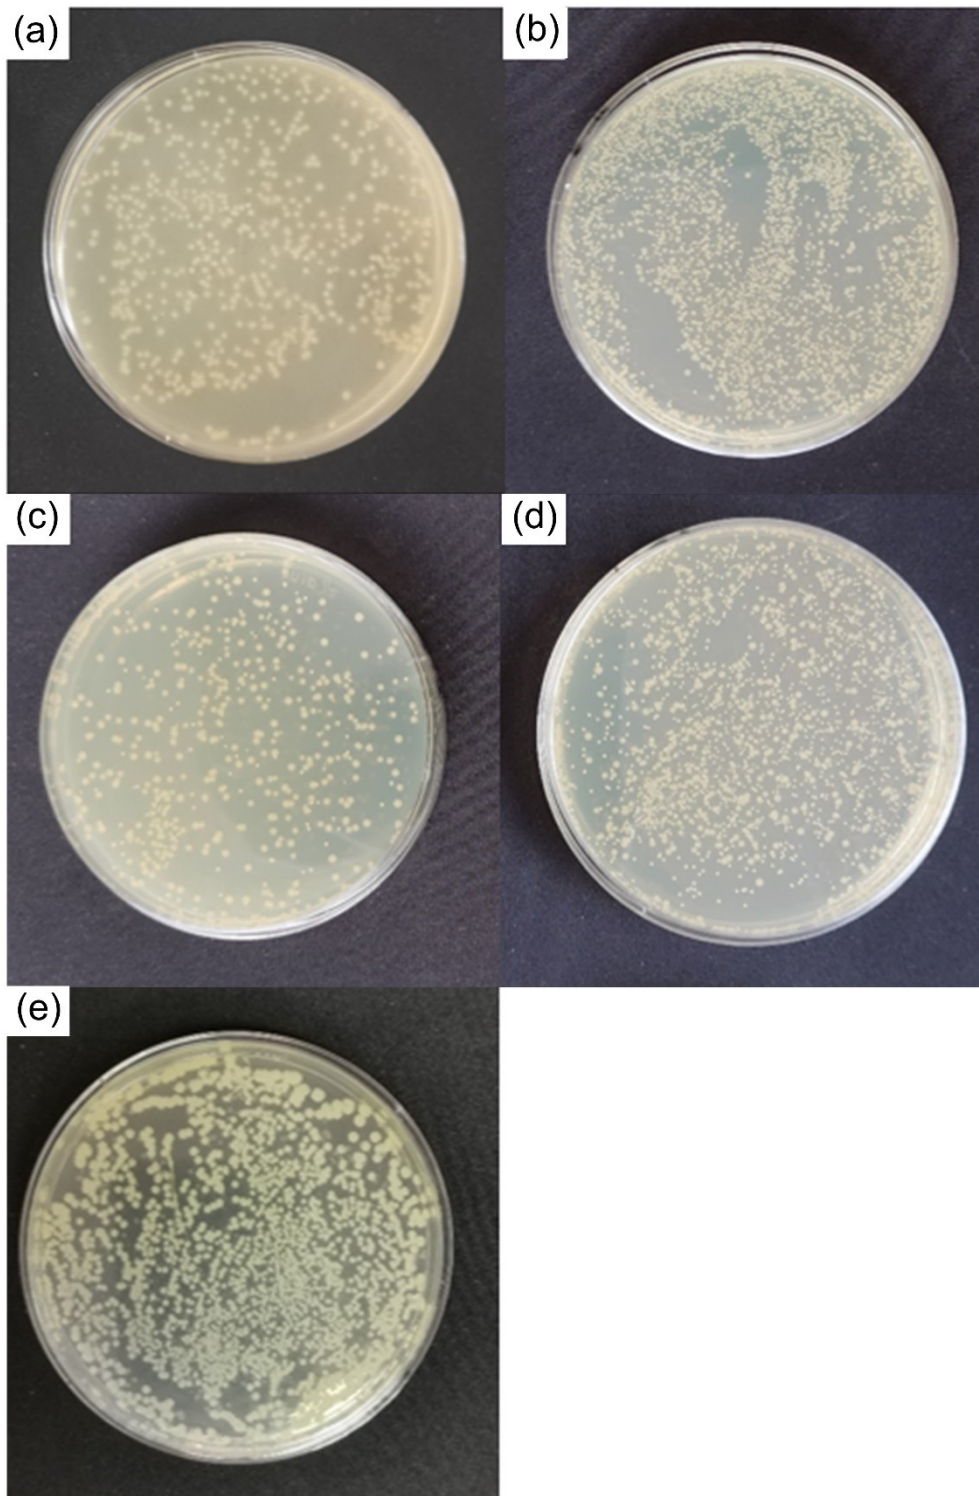

**Fig. S6** The number of colonies at different concentrations of JNs (a) 0 g/L, (b) 0.2 g/L, (c) 0.4 g/L, (d) 0.6 g/L, (e) 0.8 g/L.

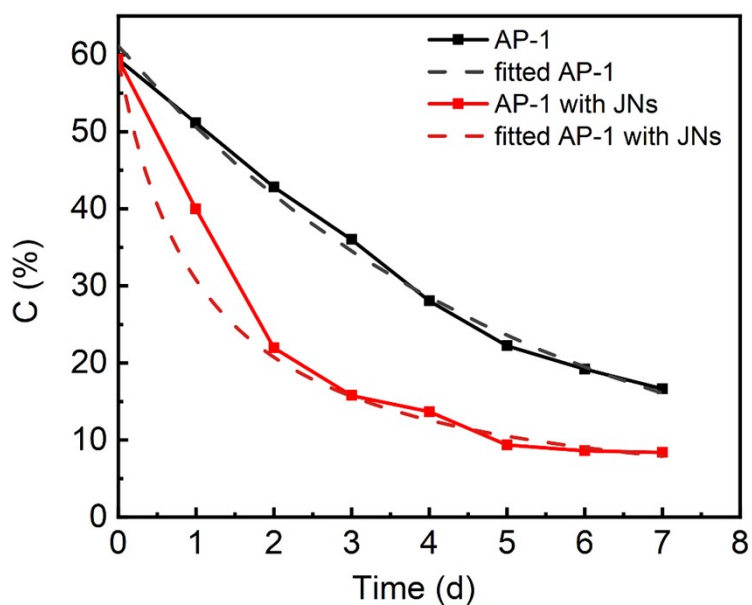

**Fig.S7** The biodegradation and fitting curves of diesel in the presence and absence of JNs respectively.

The data of degradation at different times was normalized according to Fig. 8 (c), as shown in Table 1, and then fitted the processed data according to the first-order dynamic equations (3) and second-order dynamic equations (4):

$$\ln C = -k_1 t + \ln C_0 \quad t_{\frac{1}{2}} = \frac{\ln 2}{k_1} \quad (3)$$

$$\frac{1}{C} = k_2 t + \frac{1}{C_0} \quad t_{\frac{1}{2}} = \frac{1}{k_2 C_0} \quad (4)$$

Table S2 Processed gas chromatography data

| t    | 0      | 1      | 2      | 3      | 4      | 5      | 6      | 7      |
|------|--------|--------|--------|--------|--------|--------|--------|--------|
| C    | 59.397 | 51.123 | 42.810 | 36.001 | 28.051 | 22.225 | 19.208 | 16.637 |
| C'   | 59.397 | 39.946 | 21.969 | 15.765 | 13.682 | 9.356  | 8.605  | 8.394  |
| lnC  | 4.084  | 3.934  | 3.757  | 3.584  | 3.334  | 3.101  | 2.955  | 2.812  |
| 1/C' | 0.017  | 0.025  | 0.046  | 0.063  | 0.073  | 0.107  | 0.116  | 0.119  |

where,  $t$  is the time,  $C$  is the diesel concentration and  $C_0$  is the initial diesel concentration. The concentrations of targeted compounds/compound groups were normalized against hopene.
